# Supplementary material for: Resistance Exercise and Creatine Supplementation on Fat Mass in Adults < 50 Years of Age: A Systematic Review and Meta-Analysis
Source: MDPI journal article supplement (doi:10.3390/nu15204343), 2023-10-12
Supplement: s1 [file s1]

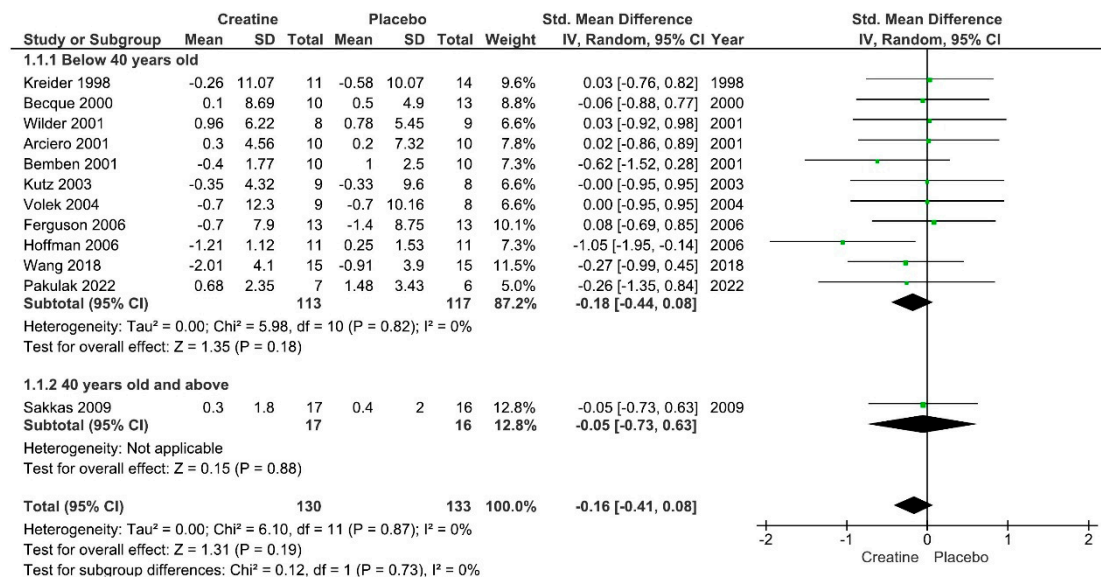

**Figure S1.** Subgroup analysis based on age (<40 years vs. 41-49 years).

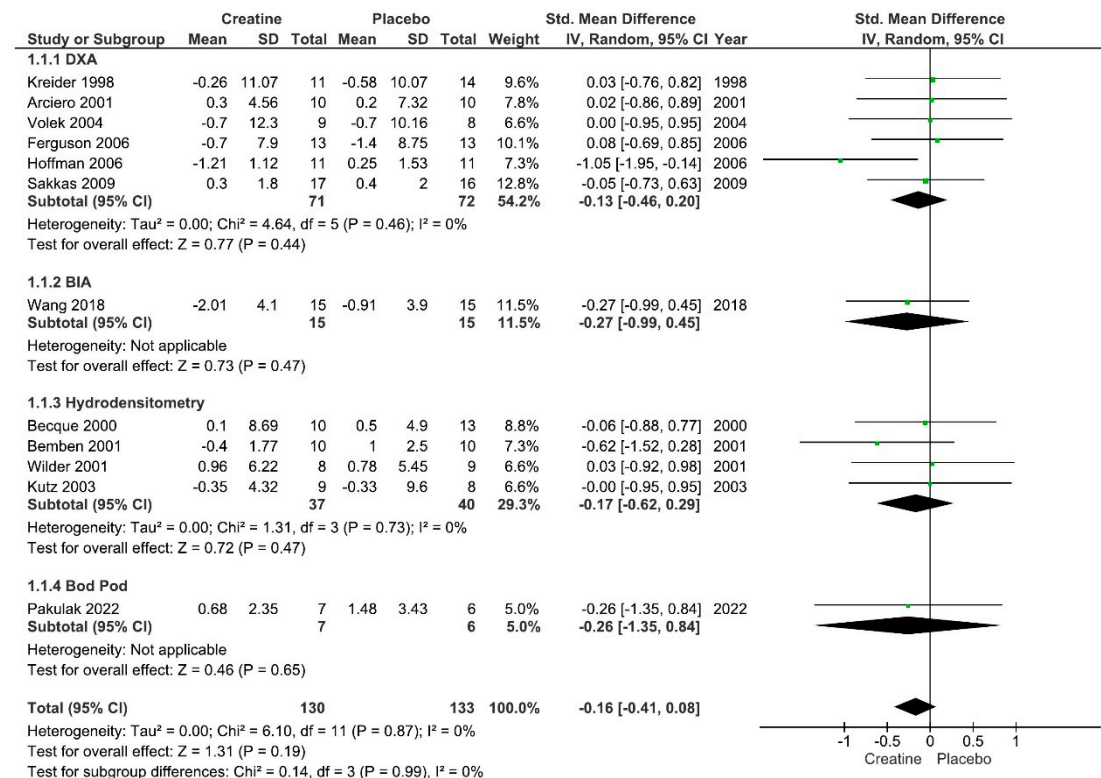

**Figure S2.** Subgroup analysis according to fat mass assessment tool.

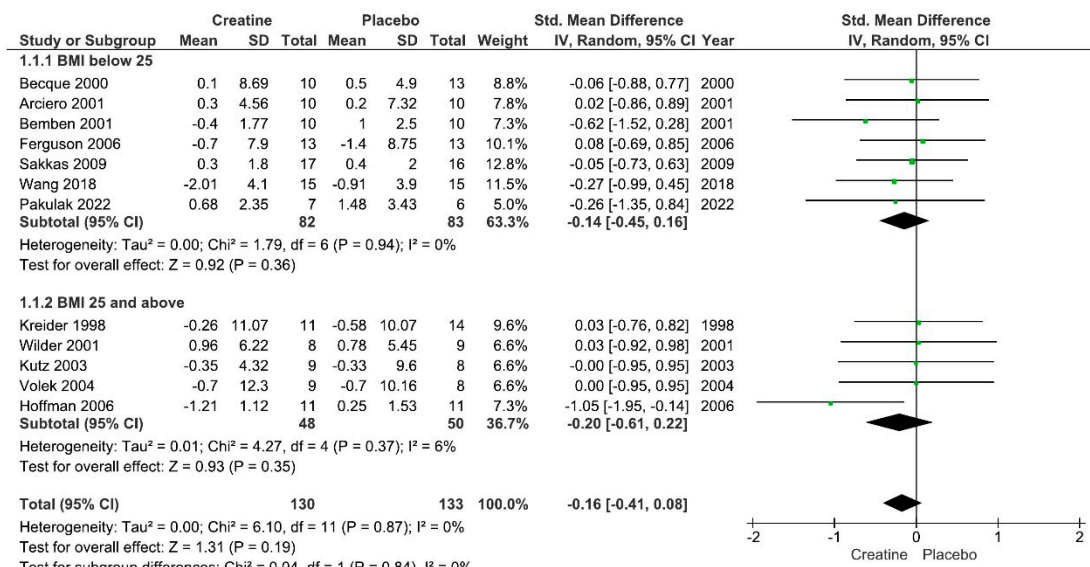

**Figure S3.** Subgroup analysis based on BMI (<25 kg/m<sup>2</sup> vs. ≥25 kg/m<sup>2</sup>).

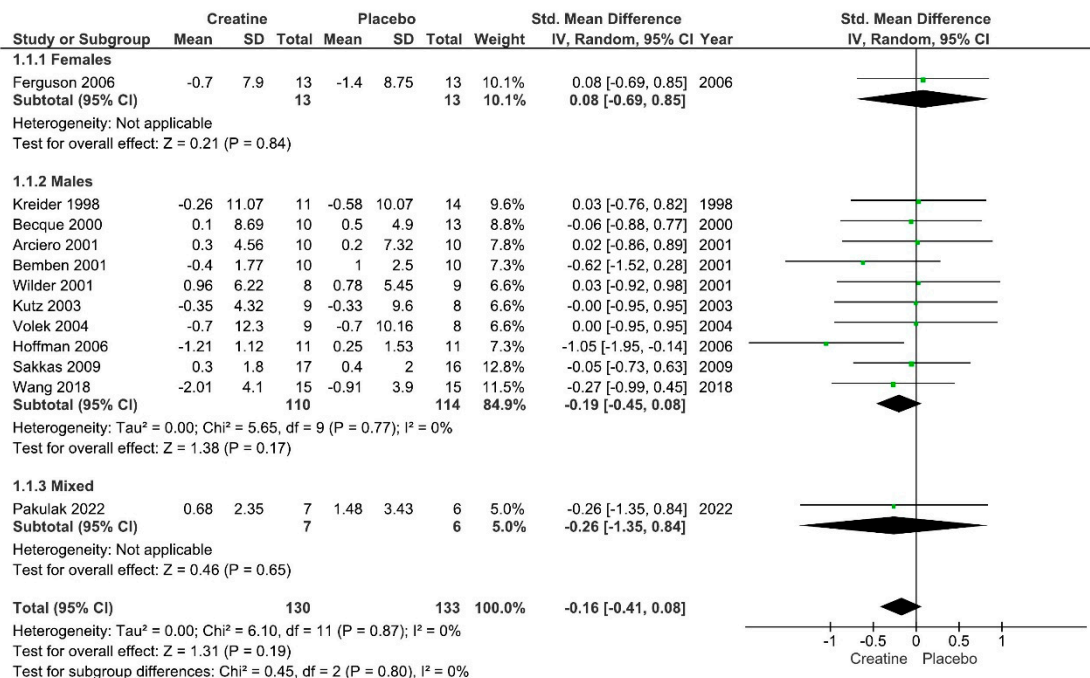

**Figure S4.** Subgroup analysis based on sex (females vs. males vs. mixed).

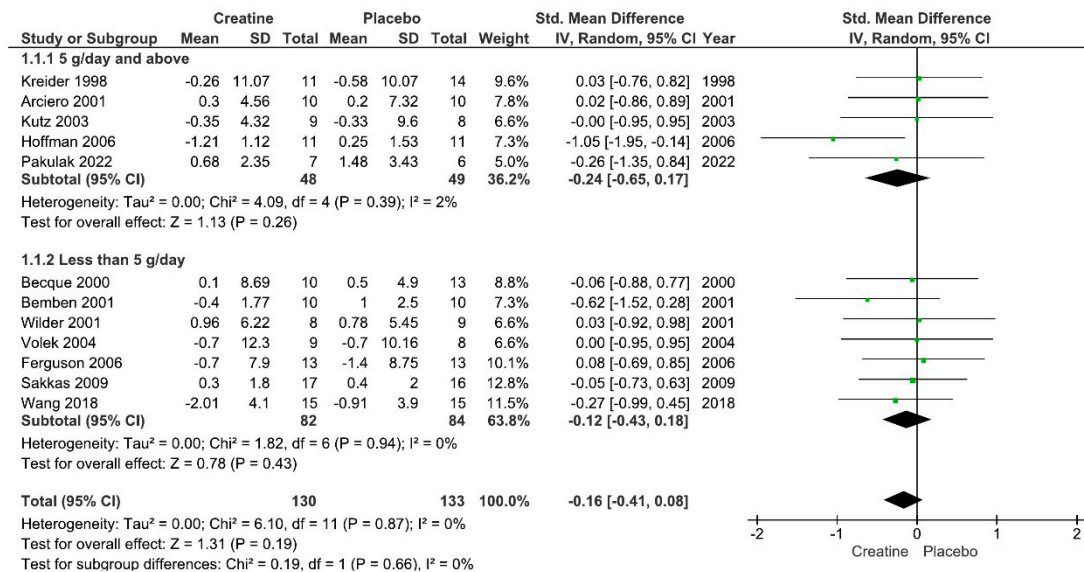

**Figure S5.** Subgroup analysis based on creatine dose (<5 g vs. ≥5 g).

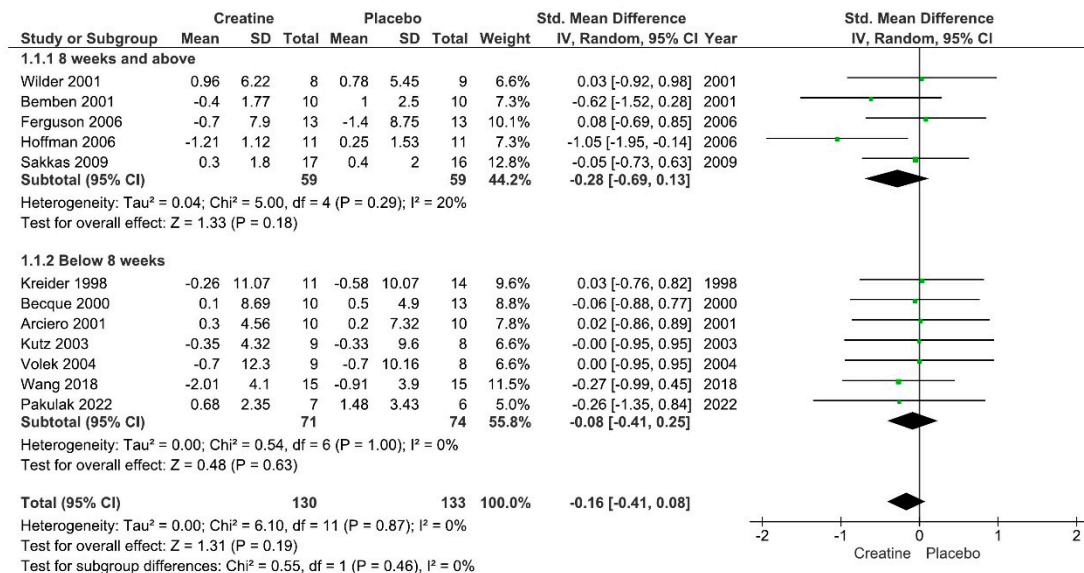

**Figure S6.** Subgroup analysis based on duration of supplementation (<8 weeks vs. ≥8 weeks).

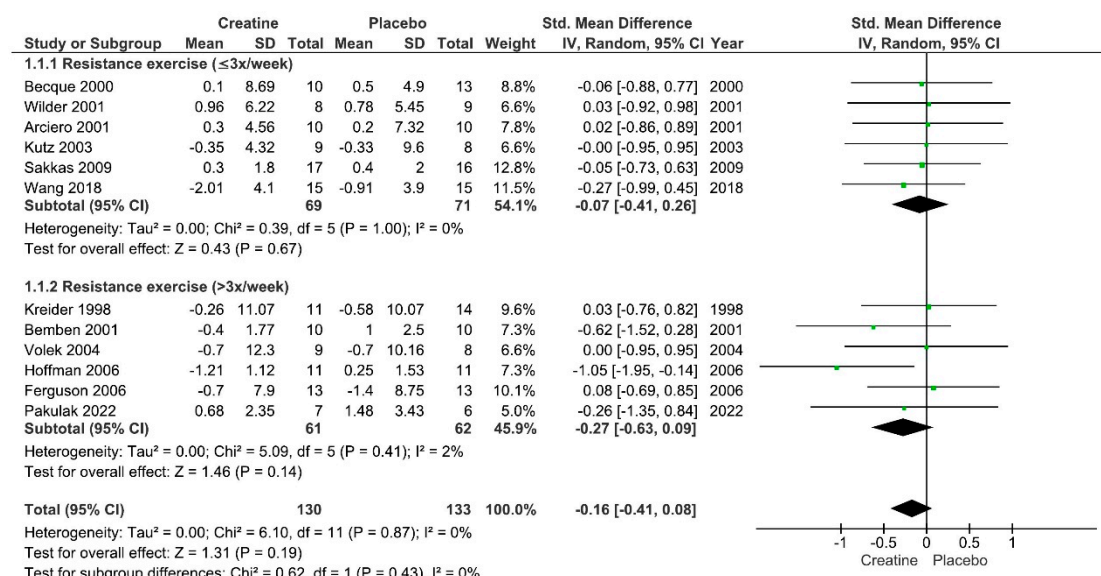

**Figure S7.** Subgroup analysis based on resistance exercise frequency ( $\leq 3$ x/wk vs.  $> 3$ x/wk).

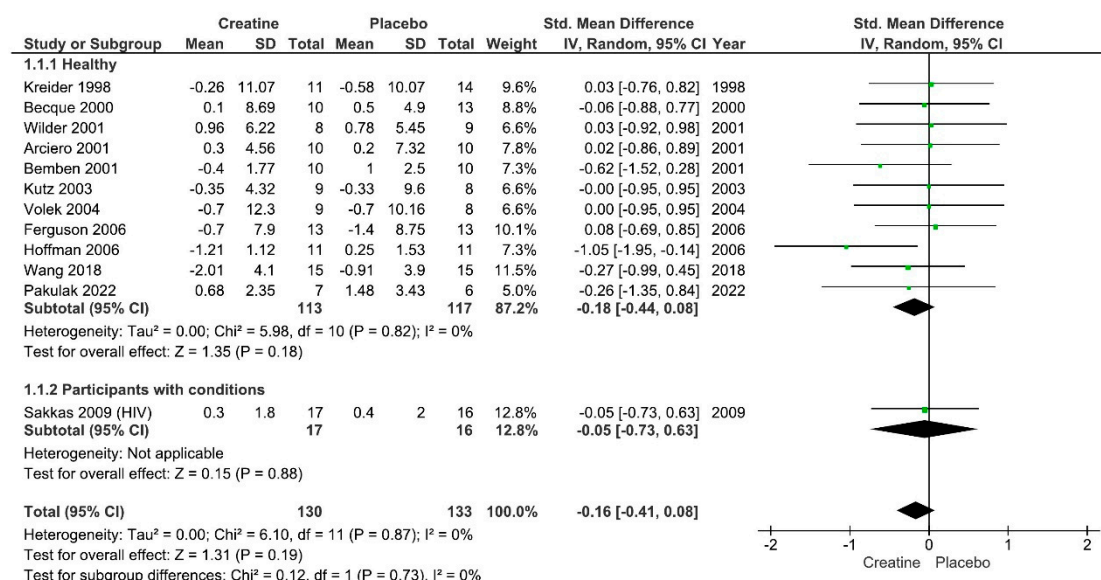

**Figure S8.** Sensitivity analysis excluding participants with health conditions.

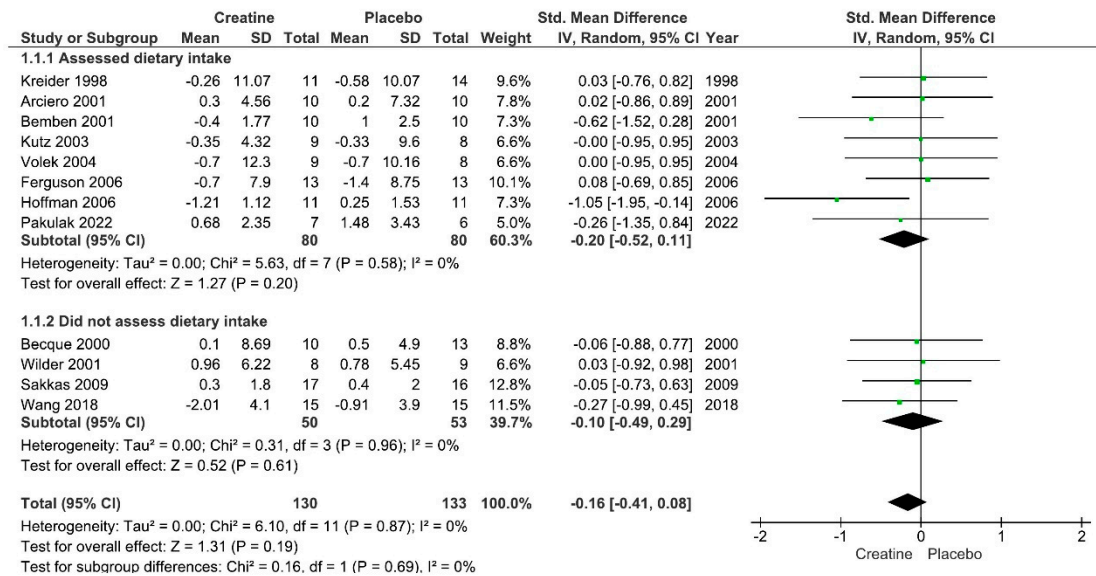

**Figure S9.** Sensitivity analysis excluding studies that did not assess dietary intake.

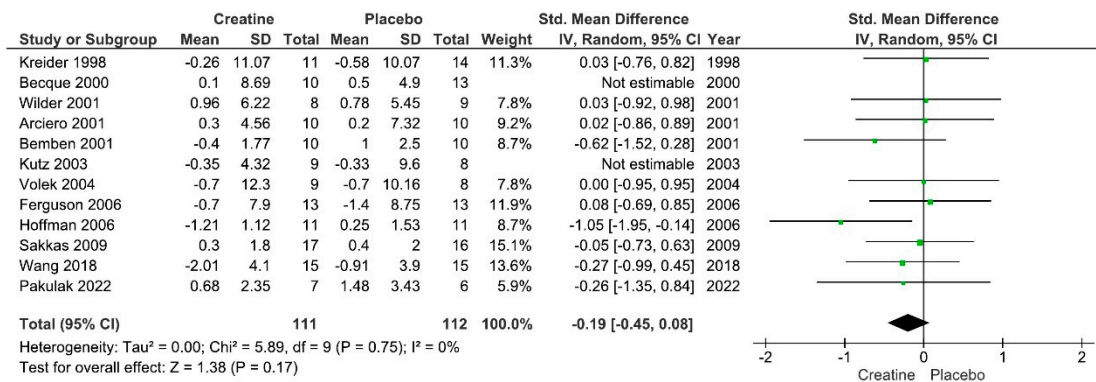

**Figure S10.** Sensitivity analysis excluding studies with increased risk of bias.
